# Supplementary material for: Nitrate Accumulation and Expression Patterns of Genes Involved in Nitrate Transport and Assimilation in Spinach
Source: MDPI journal article supplement (doi:10.3390/molecules23092231), 2018-09-02
Supplement: s1 [file s1]

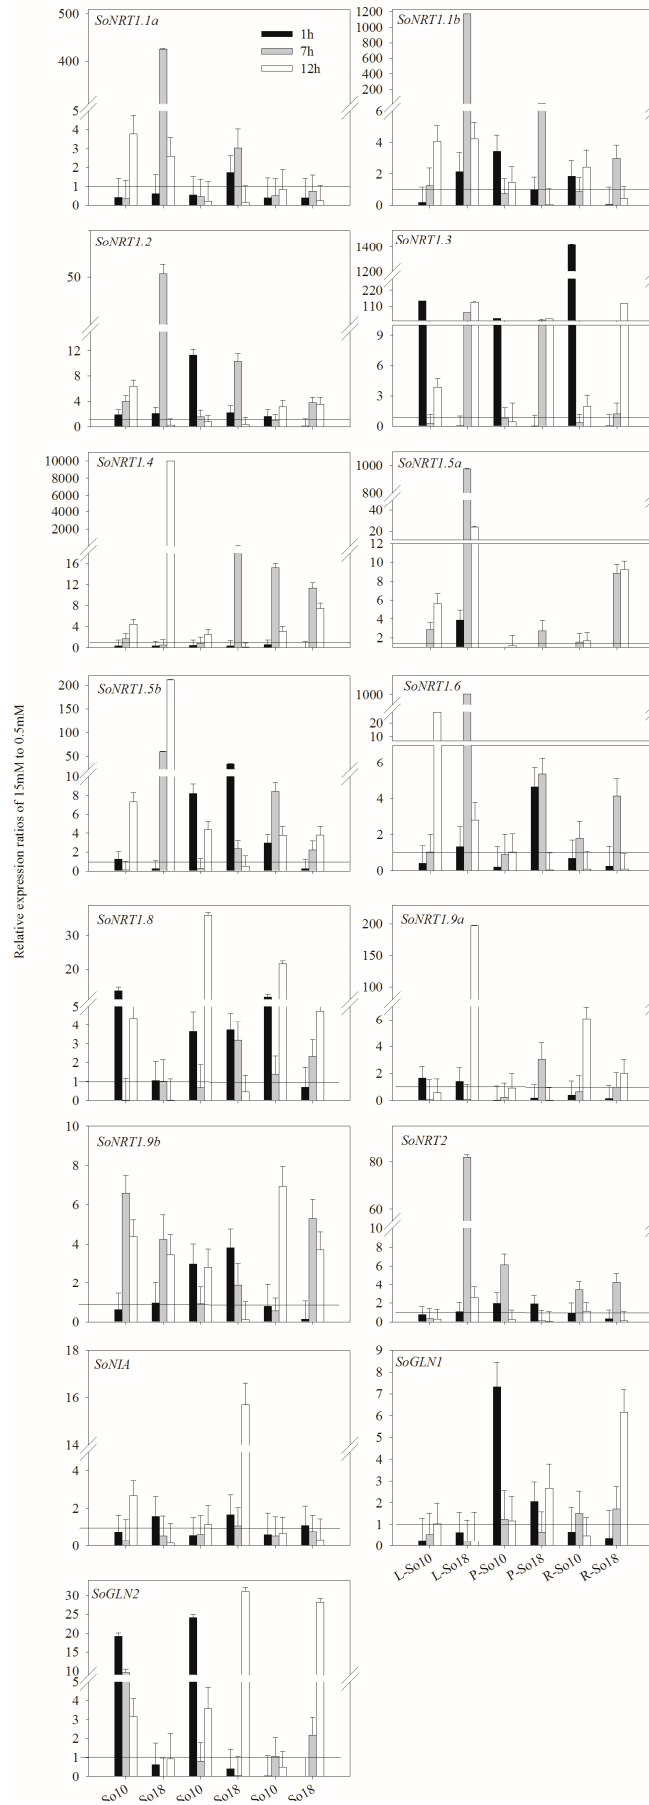

Figure S1: The ratios of the relative gene expression under high to low nitrate treatment conditions. L-So10, the leaf blades of So10; L-So18, the leaf blades of So18; P-So10, the petioles of So10; P-So18, the petioles of So18; R-So10, the roots of So10; and R-So18, the roots of So18.
